# Supplementary material for: Lymphoma-Associated Biomarkers Are Increased in Current Smokers in Twin Pairs Discordant for Smoking
Source: MDPI journal article supplement (doi:10.3390/cancers13215395), 2021-10-27
Supplement: s1 [file s1]

# Supplementary Materials: Lymphoma-Associated Biomarkers are Increased in Current Smokers in Twin Pairs Discordant for Smoking

Jun Wang, David V. Conti, Marta Epeldegui, Miina Ollikainen , Rachel F. Tyndale, Amie Eunah Hwang, Larry Magpantay, Thomas McCulloch Mack, Otoniel Martinez-Maza, Jaakko Kaprio and Wendy Coze

**Table S1.** The association <sup>1</sup> between serum cotinine defined smoking status (non-current vs. current) <sup>2</sup> and biomarker levels <sup>3</sup>.

| Variable    | Non-Current Smoking<br>(Ref) |    | Current Smoking |       |       |
|-------------|------------------------------|----|-----------------|-------|-------|
|             | N                            | N  | Beta            | SE    | P     |
| CCL17       | 85                           | 43 | 0.35            | 0.12  | 0.005 |
| sgp130      | 91                           | 43 | -13.33          | 4.92  | 0.007 |
| Haptoglobin | 85                           | 41 | 0.26            | 0.11  | 0.02  |
| Baff        | 91                           | 43 | 83.20           | 35.28 | 0.02  |
| MCP1        | 91                           | 43 | 0.20            | 0.10  | 0.04  |
| CD30        | 91                           | 43 | -0.12           | 0.07  | 0.09  |
| Endocab     | 85                           | 41 | -0.10           | 0.07  | 0.14  |
| IL2RA       | 91                           | 43 | 0.09            | 0.06  | 0.17  |
| ICAM1       | 91                           | 43 | 0.14            | 0.10  | 0.17  |
| CD163       | 91                           | 43 | -0.15           | 0.11  | 0.17  |
| CXCL13      | 91                           | 43 | 0.14            | 0.13  | 0.26  |
| FABP4       | 91                           | 43 | -0.23           | 0.22  | 0.31  |
| IL15        | 91                           | 43 | 0.07            | 0.08  | 0.34  |
| IL6         | 73                           | 37 | 0.26            | 0.28  | 0.36  |
| FGF21       | 90                           | 42 | -0.23           | 0.28  | 0.41  |
| CCL22       | 91                           | 43 | 39.59           | 49.57 | 0.42  |
| TNFR1I      | 91                           | 43 | -0.03           | 0.04  | 0.47  |
| IL1RA       | 91                           | 43 | 0.06            | 0.10  | 0.58  |
| IP10        | 91                           | 43 | 0.03            | 0.08  | 0.74  |
| IL18        | 91                           | 43 | 0.04            | 0.11  | 0.74  |
| IL8         | 91                           | 43 | 0.02            | 0.11  | 0.83  |
| FABP2       | 91                           | 43 | -0.02           | 0.12  | 0.90  |
| TNFA        | 84                           | 40 | -0.02           | 0.18  | 0.91  |
| LBP         | 91                           | 43 | -0.01           | 0.08  | 0.91  |
| IL6RA       | 91                           | 43 | -0.002          | 0.03  | 0.95  |
| CD14        | 91                           | 43 | -0.41           | 25.33 | 0.99  |
| CCL24       | 91                           | 43 | -0.001          | 0.07  | 0.99  |

<sup>1</sup> Adjusted for age and sex in the mixed models. Except BAFF, CCL22, CD14, sgp130 and IL15, all the biomarkers were run as log2 transformed in the mixed models. <sup>2</sup>Non-current smoking: serum cotinine  $\leq 3.08$  ng/mL and current smoking: serum cotinine  $> 3.08$  ng/ml. <sup>3</sup> The unit of all biomarkers is pg/ml, except CD14 and gp130 as ng/ml.

**Table S2.** The association <sup>1</sup> of serum cotinine <sup>2</sup> and immune biomarkers levels <sup>3</sup>.

| Variable    | Non-Current<br>(Ref) | Current, Low Cotinine |        |       |          | Current, High Cotinine |        |       |          | <i>P</i> <sub>trend</sub> |
|-------------|----------------------|-----------------------|--------|-------|----------|------------------------|--------|-------|----------|---------------------------|
|             | <i>N</i>             | <i>N</i>              | Beta   | SE    | <i>P</i> | <i>N</i>               | Beta   | SE    | <i>P</i> |                           |
| CCL17       | 85                   | 22                    | 0.10   | 0.14  | 0.50     | 21                     | 0.70   | 0.16  | 8.76E-06 | 0.0001                    |
| sGP130      | 91                   | 22                    | -10.00 | 5.98  | 0.09     | 21                     | -17.52 | 6.58  | 0.01     | 0.004                     |
| Baff        | 91                   | 22                    | 48.22  | 42.74 | 0.26     | 21                     | 128.87 | 47.39 | 0.01     | 0.01                      |
| Haptoglobin | 85                   | 21                    | 0.17   | 0.13  | 0.20     | 20                     | 0.37   | 0.15  | 0.01     | 0.01                      |
| MCP1        | 91                   | 22                    | 0.12   | 0.12  | 0.33     | 21                     | 0.29   | 0.13  | 0.02     | 0.02                      |

<sup>1</sup> Adjusted for age and sex in the mixed models. Except BAFF and gp130, all the biomarkers were run as log2 transformed in the mixed models. <sup>2</sup> Serum cotinine levels (ng/mL): Non-current (cotinine ≤ 3.08), current low (cotinine: 3.08–78.17), current high (cotinine >78.17). <sup>3</sup> The unit of all biomarkers is pg/ml, except gp130 as ng/ml.

**Table S3.** a and b. The association <sup>1</sup> between smoking status (never/former/current) and serum immune biomarker levels  
<sup>2</sup>. Never smokers (a) or former smokers (b) were used as reference group.

a.

| Variable    | Never(Ref) |    | Former |       |      | Current |        |       |       |
|-------------|------------|----|--------|-------|------|---------|--------|-------|-------|
|             | N          | N  | Beta   | SE    | P    | N       | Beta   | SE    | P     |
| sGP130      | 55         | 36 | -5.90  | 5.14  | 0.25 | 43      | -15.59 | 5.26  | 0.003 |
| CCL17       | 52         | 33 | 0.07   | 0.13  | 0.60 | 43      | 0.38   | 0.13  | 0.01  |
| BAFF        | 55         | 36 | -12.13 | 36.79 | 0.74 | 43      | 78.66  | 37.87 | 0.04  |
| Haptoglobin | 52         | 33 | -0.07  | 0.12  | 0.56 | 41      | 0.23   | 0.12  | 0.05  |
| MCP1        | 55         | 36 | -0.07  | 0.11  | 0.48 | 43      | 0.17   | 0.11  | 0.12  |

b.

| Variable    | Former (ref) |    | Never |       |      | Current |       |       |      |
|-------------|--------------|----|-------|-------|------|---------|-------|-------|------|
|             | N            | N  | Beta  | SE    | P    | N       | Beta  | SE    | P    |
| Baff        | 36           | 55 | 12.13 | 36.79 | 0.74 | 43      | 90.79 | 41.85 | 0.03 |
| MCP1        | 36           | 55 | 0.07  | 0.11  | 0.48 | 43      | 0.24  | 0.12  | 0.03 |
| sGP130      | 36           | 55 | 5.90  | 5.14  | 0.25 | 43      | -9.70 | 5.78  | 0.09 |
| CCL17       | 33           | 52 | -0.07 | 0.13  | 0.60 | 43      | 0.31  | 0.15  | 0.04 |
| Haptoglobin | 33           | 52 | 0.07  | 0.12  | 0.56 | 41      | 0.30  | 0.13  | 0.02 |

<sup>1</sup> Adjusted for age and sex in the mixed models. Except BAFF and gp130, all the biomarkers were run as log2 transformed in the mixed models. <sup>2</sup> The unit of all biomarkers is pg/ml, except gp130 as ng/ml.

**Table S4.** The association <sup>1</sup> of self-reported smoking status and serum immune biomarkers levels <sup>2</sup>.

| Variable    | Never<br>(Ref) | Former,<br>Years Since Quit >5 |        |       | Former,<br>Years Since Quit ≤5 |          |        | Current |          |          |        |       |          | <i>P</i> <sub>trend</sub> |
|-------------|----------------|--------------------------------|--------|-------|--------------------------------|----------|--------|---------|----------|----------|--------|-------|----------|---------------------------|
|             | <i>N</i>       | <i>N</i>                       | Beta   | SE    | <i>P</i>                       | <i>N</i> | Beta   | SE      | <i>P</i> | <i>N</i> | Beta   | SE    | <i>P</i> |                           |
| Baff        | 55             | 16                             | -2.20  | 52.46 | 0.97                           | 20       | -20.45 | 48.08   | 0.67     | 43       | 77.22  | 38.23 | 0.04     | 0.08                      |
| sgp130      | 55             | 16                             | -10.80 | 7.22  | 0.13                           | 20       | -1.84  | 6.66    | 0.78     | 43       | -14.91 | 5.28  | 0.005    | 0.01                      |
| MCP1        | 55             | 16                             | -0.18  | 0.15  | 0.22                           | 20       | 0.02   | 0.14    | 0.89     | 43       | 0.18   | 0.11  | 0.09     | 0.15                      |
| CCL17       | 52             | 13                             | -0.004 | 0.20  | 0.98                           | 20       | 0.12   | 0.17    | 0.47     | 43       | 0.38   | 0.14  | 0.005    | 0.01                      |
| Haptoglobin | 52             | 13                             | 0.07   | 0.17  | 0.68                           | 20       | -0.17  | 0.15    | 0.25     | 41       | 0.21   | 0.12  | 0.07     | 0.15                      |

<sup>1</sup> Adjusted for age and sex in the mixed models. All biomarkers except BAFF and sgp130 were run as log2 transformed in the mixed models. <sup>2</sup> The unit of all biomarkers is pg/ml, except sgp130 as ng/ml.

**Table S5.** The association <sup>1</sup> of years of smoking and serum immune biomarkers levels <sup>2</sup>.

| Variable    | Non-Current (Ref) |    | Current, Years ≤5 |       |      | Current, Years > 5 |        |       |          |                    |
|-------------|-------------------|----|-------------------|-------|------|--------------------|--------|-------|----------|--------------------|
|             | N                 | N  | Beta              | SE    | P    | N                  | Beta   | SE    | P        | P <sub>trend</sub> |
| CCL17       | 81                | 17 | 0.23              | 0.16  | 0.15 | 14                 | 0.67   | 0.18  | 2.12E-04 | 0.0002             |
| Baff        | 87                | 17 | 19.69             | 46.27 | 0.67 | 14                 | 209.04 | 52.98 | 7.95E-05 | 0.0005             |
| Haptoglobin | 81                | 17 | 0.27              | 0.13  | 0.04 | 14                 | 0.42   | 0.15  | 0.004    | 0.001              |
| sgp130      | 87                | 17 | -10.44            | 6.50  | 0.11 | 14                 | -15.93 | 7.34  | 0.03     | 0.01               |
| MCP1        | 87                | 17 | 0.09              | 0.14  | 0.53 | 14                 | 0.23   | 0.15  | 0.14     | 0.12               |

<sup>1</sup> Adjusted for age and sex in the mixed models. All biomarkers except BAFF and sGP130, were log2 transformed in the mixed models. <sup>2</sup> The unit of all biomarkers is pg/mL, except sgp130 as ng/mL.

**Table S6.** The association <sup>1</sup> of cigarettes per day (CPD) and serum immune biomarkers levels <sup>2</sup>.

| Variable    | Non-Cur-<br>rent (Ref) | Current, CPD < 10 |        |       |          | Current, CPD ≥ 10 |        |       |          |                           |
|-------------|------------------------|-------------------|--------|-------|----------|-------------------|--------|-------|----------|---------------------------|
|             | <i>N</i>               | <i>N</i>          | Beta   | SE    | <i>P</i> | <i>N</i>          | Beta   | SE    | <i>P</i> | <i>P</i> <sub>trend</sub> |
| Haptoglobin | 81                     | 12                | 0.17   | 0.15  | 0.26     | 17                | 0.42   | 0.13  | 0.001    | 0.001                     |
| CCL17       | 81                     | 12                | 0.24   | 0.18  | 0.20     | 17                | 0.47   | 0.16  | 0.003    | 0.002                     |
| Baff        | 87                     | 12                | -6.78  | 55.53 | 0.90     | 17                | 165.80 | 47.23 | 0.0004   | 0.002                     |
| sgp130      | 87                     | 12                | -10.57 | 7.65  | 0.17     | 17                | -13.06 | 6.53  | 0.05     | 0.02                      |
| MCP1        | 87                     | 12                | 0.22   | 0.16  | 0.19     | 17                | 0.07   | 0.14  | 0.60     | 0.42                      |

<sup>1</sup> Adjusted for age and sex in the mixed models. Except BAFF and gp130, all the biomarkers were run as log2 transformed in the mixed models. <sup>2</sup> The unit of all biomarkers is pg/mL, except sgp130 as ng/mL.

**Table S7.** Biomarker intra-pair correlation coefficient (ICC) in the 67 MZ twin pairs.

| <b>Biomarker</b> | <b>ICC (95%CI)</b> | <b>P</b>               |
|------------------|--------------------|------------------------|
| IL6RA            | 0.90(0.84–0.94)    | $7.05 \times 10^{-26}$ |
| CCL24            | 0.87(0.80–0.92)    | $4.96 \times 10^{-23}$ |
| EndoCAB          | 0.70(0.56–0.81)    | $3.11 \times 10^{-11}$ |
| ICAM             | 0.67(0.51–0.78)    | $2.18 \times 10^{-10}$ |
| TNFR2            | 0.66(0.50–0.77)    | $4.77 \times 10^{-10}$ |
| CCL17            | 0.66(0.50–0.78)    | $6.69 \times 10^{-10}$ |
| LBP              | 0.65(0.48–0.77)    | $1.07 \times 10^{-9}$  |
| IL2Ra            | 0.62(0.45–0.75)    | $6.25 \times 10^{-9}$  |
| BAFF             | 0.60(0.42–0.73)    | $3.00 \times 10^{-8}$  |
| IL1Ra            | 0.55(0.37–0.70)    | $3.95 \times 10^{-7}$  |
| CCL22            | 0.55(0.37–0.70)    | $4.02 \times 10^{-7}$  |
| CD163            | 0.54(0.35–0.69)    | $6.81 \times 10^{-7}$  |
| sgp130           | 0.54(0.35–0.69)    | $8.81 \times 10^{-7}$  |
| CD30             | 0.53(0.34–0.68)    | $1.42 \times 10^{-6}$  |
| IL18             | 0.52(0.32–0.68)    | $2.37 \times 10^{-6}$  |
| CD14             | 0.51(0.31–0.67)    | $4.47 \times 10^{-6}$  |
| FGF21            | 0.49(0.28–0.65)    | $1.22 \times 10^{-5}$  |
| IL8              | 0.45(0.24–0.62)    | $4.64 \times 10^{-5}$  |
| IP10             | 0.44(0.23–0.62)    | $6.77 \times 10^{-5}$  |
| Haptoglobin      | 0.44(0.22–0.62)    | 0.0001                 |
| IL15             | 0.41(0.19–0.59)    | 0.0002                 |
| FABP2            | 0.41(0.19–0.59)    | 0.0002                 |
| IL6              | 0.42(0.18–0.61)    | 0.001                  |
| FABP4            | 0.34(0.12–0.54)    | 0.002                  |
| CXCL13           | 0.34(0.11–0.53)    | 0.002                  |
| MCP1             | 0.28(0.04–0.48)    | 0.01                   |
| TNFa             | 0.14(–0.11–0.38)   | 0.13                   |

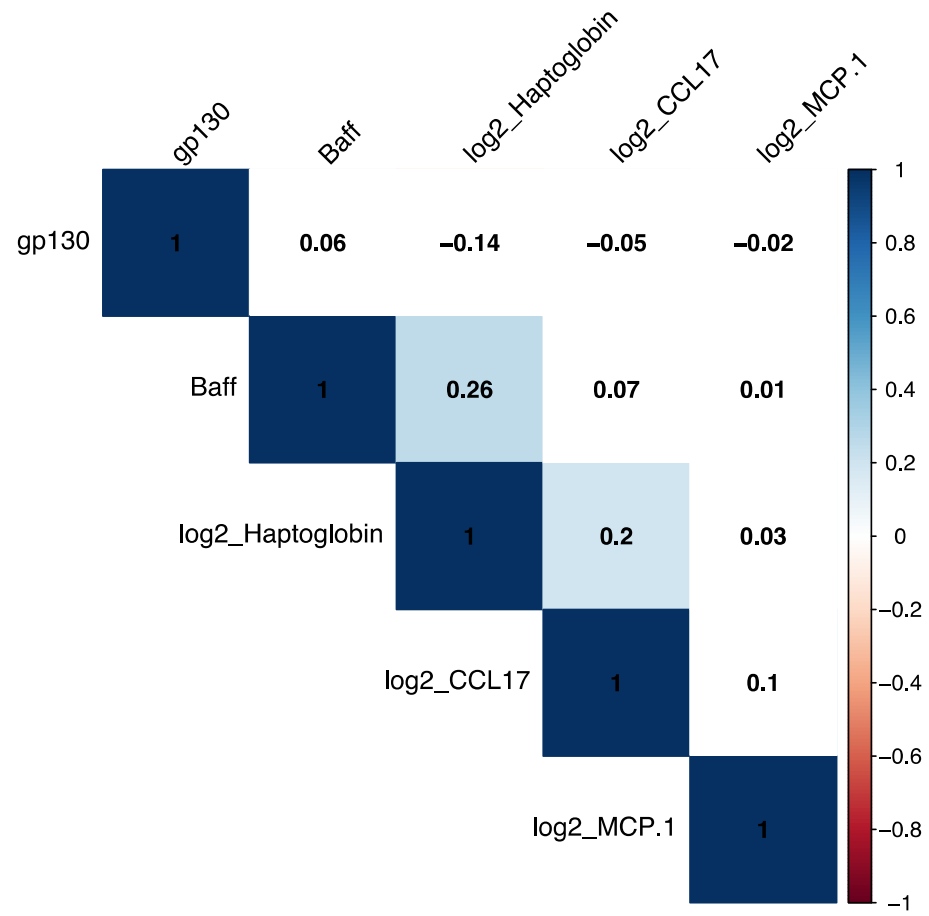

**Figure S1.** Pearson correlation <sup>1</sup> of serum biomarkers <sup>2</sup>. <sup>1</sup>Numbers are correlation coefficients. Non-significant correlation ( $P > 0.05$ ) is shown as white color. <sup>2</sup> Only for markers which were significant association with serum cotinine levels.
